# Supplementary material
Source: MDPI journal article supplement (https://www.mdpi.com/2073-4441/10/2/142)
Supplement: s1 [file s1]

Gene Expression Programming Coupled with Unsupervised Learning: A Two-Stage Learning Process in Multi-Scale, Short-Term Water
Demand Forecasts

**Supplementary Materials:** The following are available online at www.mdpi.com/link, Python Code for the selected GEP model.

Python Code for the Selected GEP Model

# Regression model generated by GeneXproTools 5.0 on 10/23/2017 12:24:57 PM

# GEP File: C:\Users\shabani\Desktop\Clustered + GEP Paper\ALL 90 models\K3HT1OP1.gep

# Training Records: 572

# Validation Records: 143

# Fitness Function: RMSE

# Training Fitness: 803.686978350874

# Training R-square: 0.940232394017262

# Validation Fitness: 809.891789934083

# Validation R-square: 0.931516795833398

#------------------------------------------------------------------------

from math import *

def gepModel(d):

G1C9 = -3.26853790974151e-02

G1C3 = -3.18216498306223

Standardize(d)

y = 0.0

y = ((d[4]+(((d[1]-d[4])-d[4])*(G1C9*G1C3)))-d[3])

y = y + d[0]

y = y + (d[4]-d[0])

y = Reverse_Standardization(y)

return y

def Standardize(input):

AVERAGE_0 = 22956.3688811189

STDEV_0 = 5003.62843504768

input[0] = (input[0] - AVERAGE_0) / STDEV_0

AVERAGE_1 = 22964.636013986

STDEV_1 = 4999.08753180465

input[1] = (input[1] - AVERAGE_1) / STDEV_1

AVERAGE_3 = 22978.497027972

STDEV_3 = 4986.44287669382

input[3] = (input[3] - AVERAGE_3) / STDEV_3

AVERAGE_4 = 22980.8622377622

STDEV_4 = 4983.37909553497

input[4] = (input[4] - AVERAGE_4) / STDEV_4

def Reverse_Standardization(modelOutput):

# Model standardization

MODEL_AVERAGE = -1.03668530636382E-15

MODEL_STDEV = 0.971247647537788

modelOutput = (modelOutput - MODEL_AVERAGE)/MODEL_STDEV

# Reverse standardization

TARGET_AVERAGE = 22978.8772727273

TARGET_STDEV = 4985.99234334088

return modelOutput * TARGET_STDEV + TARGET_AVERAGE
